# Supplementary material for: Effects of Algicidal Macrophyte Metabolites on Cyanobacteria, Microcystins, Other Plankton, and Fish in Microcosms
Source: MDPI journal article supplement (doi:10.3390/toxins15090529), 2023-08-28
Supplement: s1 [file s1]

Article

# Effects of Algicidal Macrophyte Metabolites on Cyanobacteria, Microcystins, Other Plankton, and Fish in Microcosms

## Supplementary materials

**Figure S1:** View of microcosms setup. Photo A. Mavrin.

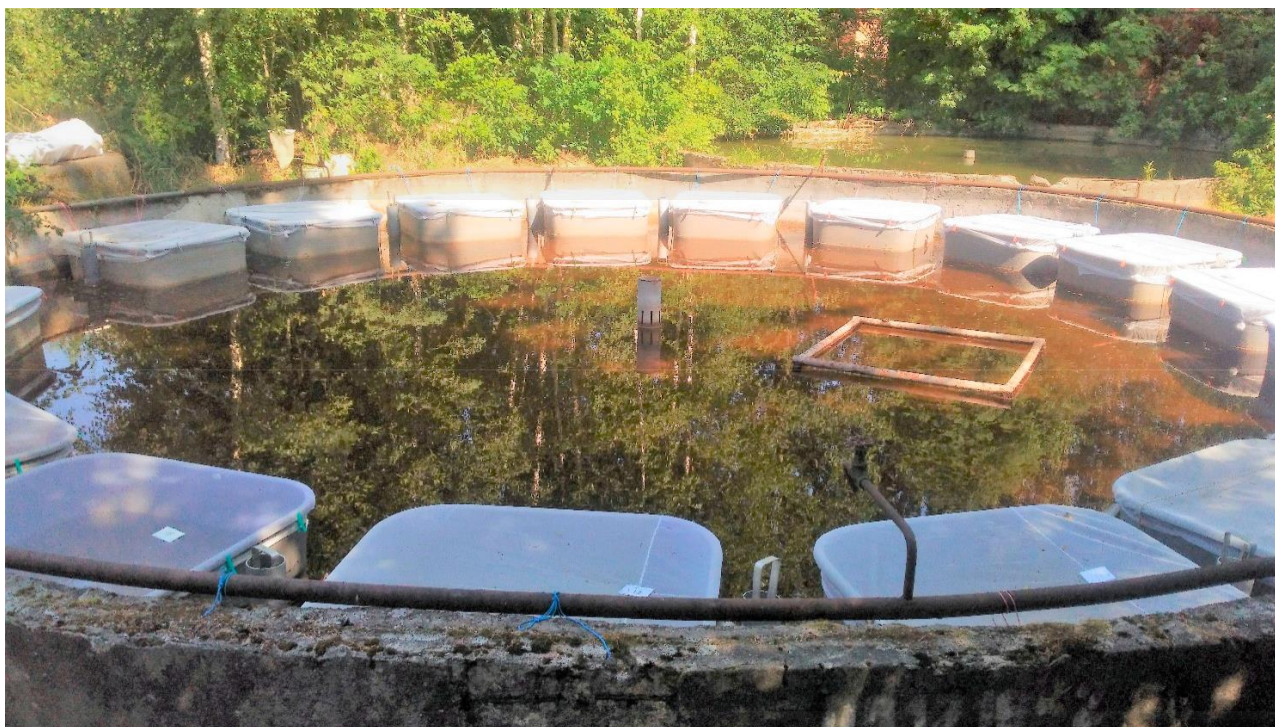

**Figure S2:** Dynamics of hydrochemical variables during exposure. Mean values and confidence intervals are given (n=3).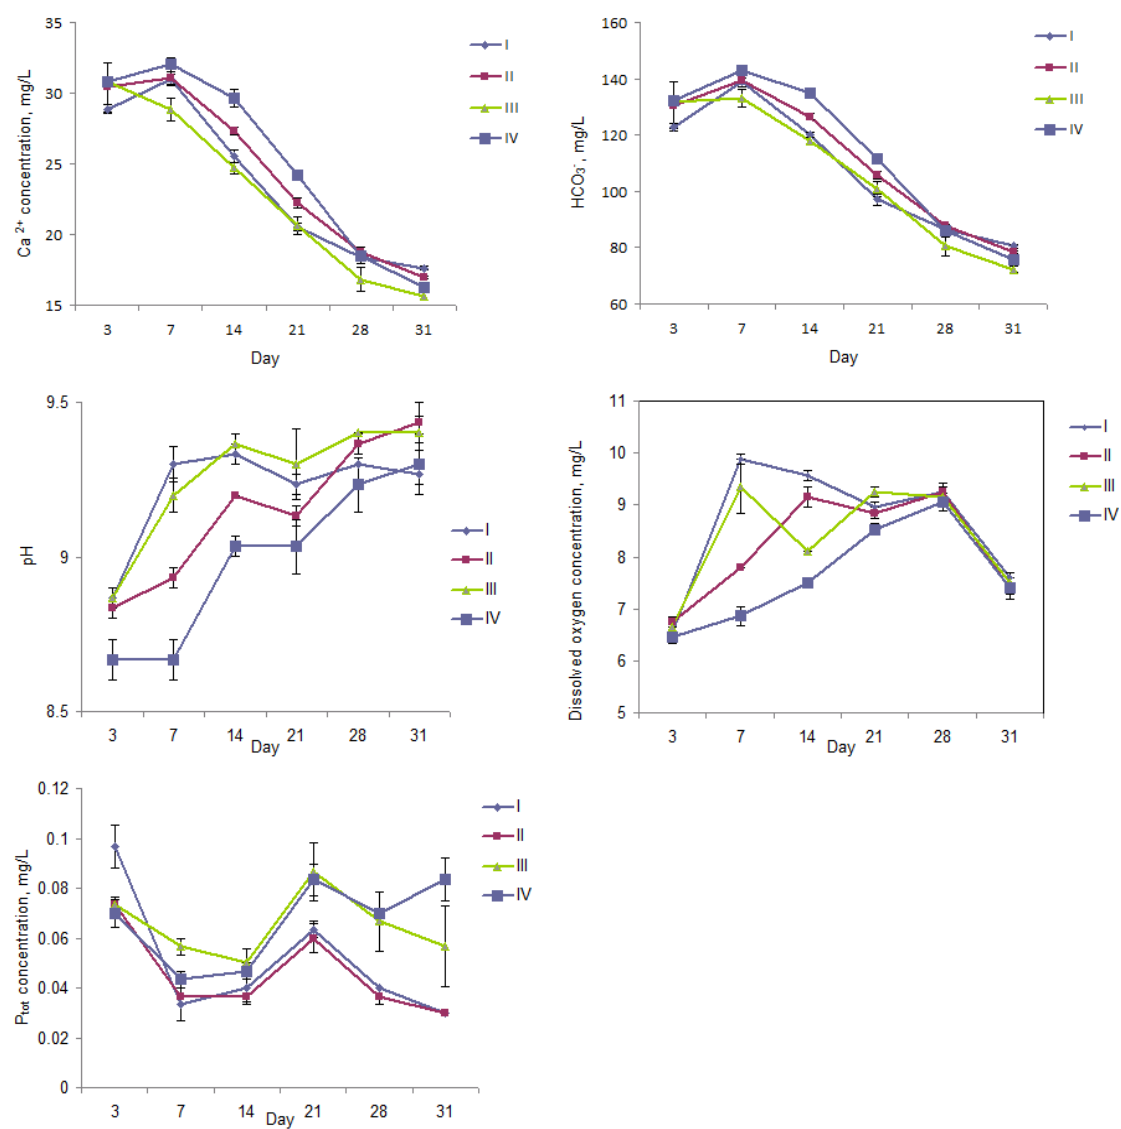

**Table S1.** List of species of phytoplankton in four treatments (I, II, III, IV) during experimental exposition.

|                                    | Treatment |     |     |     |
|------------------------------------|-----------|-----|-----|-----|
|                                    | I         | II  | III | IV  |
| <b>Cyanobacteria</b>               |           |     |     |     |
| <i>Dolichospermum spiralis</i>     | xxx       | xxx | xxx | xxx |
| <i>Dolichospermum affinis</i>      | x         | x   | x   | x   |
| <i>Pseudanabaena limnetica</i>     | x         | x   |     |     |
| <i>Aphanocapsa delicatissima</i>   | x         | x   | x   | x   |
| <i>Aphanocapsa planctonica</i>     | x         | x   | xx  | x   |
| <i>Aphanothece stagnina</i>        | x         | -   | -   | -   |
| <i>Aphanizomenon flos-aquae</i>    | xxx       | xxx | xxx | xxx |
| <i>Aphanizomenon issatschenkoi</i> | x         | x   | xx  | xx  |
| <i>Aphanizomenon gracile</i>       | -         | -   | xx  | -   |
| <i>Coelosphaerium kutzingianum</i> | x         | -   | x   | x   |
| <i>Nostoc kihlmani</i>             | -         | -   | -   | x   |
| <i>Phormidium</i> sp.              | x         | -   | -   | -   |
| <i>Pseudoanabaena</i> sp.          | x         | -   | x   | -   |
| <i>Microcystis aeruginosa</i>      | xx        | x   | xx  | xxx |
| <i>Planktolyngbya limnetica</i>    | x         | xx  | x   | xx  |
| <i>Merismopedia</i> sp.            | x         | x   | x   | x   |
| <i>Nodularia</i> sp.               | x         | x   | x   | x   |
| <i>Snowella fenica</i>             | x         | x   | x   | x   |
| <i>Synechocystis</i> sp.           | -         | -   | x   | x   |
| <b>Cryptophyta</b>                 |           |     |     |     |
| <i>Komma caudata</i>               | x         | x   | x   | x   |
| <i>Cryptomonas</i> sp.             | xx        | xxx | xx  | x   |
| <i>Cryptomonas marsonii</i>        | xxx       | xxx | xx  | x   |
| <i>Chroomonas acuta</i>            | x         | x   | x   | x   |
| <i>Katablepharis ovalis</i>        | x         | -   | x   | -   |
| <b>Chrysophyta</b>                 |           |     |     |     |
| <i>Dynobryon cylindricum</i>       | -         | -   | -   | x   |
| <i>Mallomonas</i> sp.              | x         | x   | x   | x   |
| <b>Dynophyta</b>                   |           |     |     |     |
| <i>Ceratium hirundinella</i>       | x         | xx  | xx  | x   |
| <i>Gymnodinium</i> sp.             | x         | x   | x   | x   |
| <i>Peridinium aciculiferum</i>     | -         | -   | x   | x   |
| <i>Peridinium</i> sp.              | -         | x   | x   | x   |
| <b>Bacillariophyta</b>             |           |     |     |     |
| <i>Aulacoseira granulata</i>       | xxx       | xxx | xxx | xxx |
| <i>Fragilaria</i> sp.              | x         | x   | x   | x   |
| <i>Navicula</i> sp.                | -         | -   | x   | -   |
| <i>Nitzschia acicularis</i>        | x         | x   | x   | x   |

|                                     |    |   |    |    |
|-------------------------------------|----|---|----|----|
| <i>Pinularia</i> sp.                | x  | - | -  | -  |
| <i>Synedra nana</i>                 | x  | x | x  | x  |
| <i>Belonastrum berolinensis</i>     | x  | x | x  | -  |
| <i>Ulnaria acuc</i>                 | -  | x | xx | x  |
| <b>Chlorophyta</b>                  |    |   |    |    |
| <i>Chlorella</i> sp.                | x  | x | x  | x  |
| <i>Chlamydocapsa planctonica</i>    | -  | - | x  | -  |
| <i>Coelastrum sphaericum</i>        | x  | - | -  | -  |
| <i>Coelastrum microporum</i>        | x  | x | x  | x  |
| <i>Coelastrum astroideum</i>        | x  | x | x  | x  |
| <i>Botryococcus braunii</i>         | x  | x | x  | x  |
| <i>Actinastrum</i> sp.              | -  | - | -  | x  |
| <i>Ankyra judayi</i>                | -  | x | x  | -  |
| <i>Ankyra ancora</i>                | x  | - | -  | x  |
| <i>Ankistrodesmus fusiformis</i>    | xx | x | x  | xx |
| <i>Dictyosphaerium ehrenberg</i>    | -- | x |    | x  |
| <i>Dictyosphaerium subsolitariu</i> | x  | x | x  | x  |
| <i>Dictyosphaerium pulhellum</i>    | -  | x |    | x  |
| <i>Geminella planctonica</i>        | -  | x | x  | -  |
| <i>Geminella pulcha</i>             | -  | x | -  | -  |
| <i>Gloeotila pelagica</i>           | -  | x | x  | x  |
| <i>Gloeotila fenica</i>             | x  | x | -  | x  |
| <i>Keratococcus suecicus</i>        | -  | - | -  | x  |
| <i>Korschikoviella limnetica</i>    | x  | x | x  | -  |
| <i>Kirchneriella obesa</i>          | -  | - | -  | x  |
| <i>Kirchneriella lynaris</i>        | -  | - | -  | x  |
| <i>Pediastrum borianum</i>          | x  | x | x  | x  |
| <i>Planctonema lauterbornii</i>     | x  | x | x  | x  |
| <i>Planktosphaeria gelatinosa</i>   | x  | x | -  | -  |
| <i>Pandorina morum</i>              | x  | - | -  | x  |
| <i>Eudorina elegans</i>             | -  | - | -  | x  |
| <i>Sphaerocystis schroeteri</i>     | x  | x | x  | x  |
| <i>Oocystis lacustris</i>           | x  | x | x  | x  |
| <i>Monoraphidium contortum</i>      | x  | - | x  | x  |
| <i>Monoraphidium dubovskii</i>      | x  | x | -  | x  |
| <i>Monoraphidium mirabile</i>       | x  | - | x  | x  |
| <i>Monoraphidium griffithii</i>     | x  | x | x  | x  |
| <i>Nephrocytium agardhianum</i>     | -  | x | x  | x  |
| <i>Volvox</i> sp.                   | x  | x | -  | -  |
| <i>Scenedesmus quadricauda</i>      | x  | x | x  | x  |
| <i>Scenedesmus acuminatus</i>       | -  | x |    | x  |
| <i>Scenedesmus sempervirens</i>     | x  | x | x  | x  |

|                              |    |     |     |     |
|------------------------------|----|-----|-----|-----|
| <i>Selenastrum gracile</i>   | x  | -   | -   | -   |
| <i>Tetraëdron minimum</i>    | x  | x   | x   | x   |
| <i>Sorastrum spinulosum</i>  | -  | x   | -   | x   |
| <b>Charophyta</b>            |    |     |     |     |
| <i>Mougeotia</i> sp.         | xx | xxx | xxx | xxx |
| <i>Elakatothrix</i>          | x  | x   | x   | x   |
| <i>Cosmarium meneghinii</i>  | x  | x   | x   | x   |
| <i>Cosmarium impressulum</i> | x  | -   | -   | x   |
| <i>Closterium acutum</i>     | -  | x   | x   | x   |
| <i>Spirogyra</i> sp.         | -  | x   | -   | -   |
| <i>Spondylosium planum</i>   | -  | -   | x   | -   |
| <i>Stauroastrum</i>          | x  | x   | x   | x   |
| <i>Staurodesmus</i>          | x  | -   | -   | -   |

Note.

xxx species dominates, accounting for more than 10% of the total phytoplankton biomass

xx species less than 5% of total biomass

x species makes up 5 to 10% of the total biomass

- species not found.

**Table S2.** Mean concentrations of various microcystin forms and their 95% confidence intervals in experimental treatments I, II, III, and IV. The different letters show significant differences ( $p < 0.05$ ) between pairs per date.

| Treatment                | I      | II     | III    | IV     | I       | II      | III   | IV    | I       | II      | III     | IV      |
|--------------------------|--------|--------|--------|--------|---------|---------|-------|-------|---------|---------|---------|---------|
| Mean                     | 19.07  | 19.07  | 19.07  | 19.07  | 5.08    | 5.08    | 5.08  | 5.08  | 19.08   | 19.08   | 19.08   | 19.08   |
| [D-Asp3]MC-LR            | 0.338  | 0.309  | 0.409  | 0.433  | 0.316   | 0.093   | 0.437 | 0.363 | 0.222   | 0.037   | 0.454   | 0.491   |
| MC-LR                    | 6.405  | 6.744  | 9.371  | 9.360  | 0.280   | 0.401   | 2.326 | 2.043 | 0.123   | 0.143   | 0.683   | 1.248   |
| [D-Glu-OCH36]MC-LR       | 0.092  | 0.101  | 0.140  | 0.151  | < 0.001 | < 0.001 | 0.024 | 0.021 | < 0.001 | < 0.001 | < 0.001 | < 0.001 |
| [D-Asp3]MC-RR            | 0.006  | 0.010  | 0.014  | 0.012  | < 0.001 | < 0.001 | 0.000 | 0.002 | < 0.001 | < 0.001 | < 0.001 | < 0.001 |
| MC-LW                    | 0.020  | 0.022  | 0.035  | 0.041  | < 0.001 | 0.002   | 0.013 | 0.009 | < 0.001 | < 0.001 | < 0.001 | < 0.001 |
| [Dha7]MC-YR              | 0.532  | 0.534  | 0.617  | 0.699  | 0.516   | 0.128   | 0.465 | 0.367 | 0.208   | 0.065   | 0.238   | 0.260   |
| MC-RR                    | 0.039  | 0.050  | 0.075  | 0.076  | 0.001   | 0.002   | 0.006 | 0.005 | 0.003   | 0.014   | 0.007   | 0.011   |
| MC-YR                    | 1.911  | 1.988  | 1.639  | 1.609  | 3.635   | 0.658   | 5.229 | 2.624 | 1.756   | 0.247   | 5.694   | 4.028   |
| Treatment                | I      | II     | III    | IV     | I       | II      | III   | IV    | I       | II      | III     | IV      |
| 95% confidence intervals | 19.070 | 19.070 | 19.070 | 19.070 | 5.080   | 5.080   | 5.080 | 5.080 | 19.080  | 19.080  | 19.080  | 19.080  |
| [D-Asp3]MC-LR            | 0.026  | 0.022  | 0.336  | 0.072  | 0.086   | 0.031   | 0.044 | 0.030 | 0.011   | 0.000   | 0.056   | 0.017   |
| MC-LR                    | 0.494  | 0.020  | 0.101  | 1.120  | 0.109   | 0.048   | 0.952 | 0.194 | 0.033   | 0.091   | 0.252   | 0.043   |
| [D-Glu-OCH36]MC-LR       | 0.007  | 0.007  | 0.115  | 0.025  | -       | -       | 0.002 | 0.002 | -       | -       | -       | -       |
| [D-Asp3]MC-RR            | 0.000  | 0.000  | 0.000  | 0.002  | -       | -       | 0.001 | 0.000 | -       | -       | -       | -       |
| MC-LW                    | 0.002  | 0.002  | 0.029  | 0.007  | -       | 0.001   | 0.001 | 0.001 | -       | -       | -       | -       |
| [Dha7]MC-YR              | 0.006  | 0.031  | 0.220  | 0.016  | 0.006   | 0.001   | 0.008 | 0.010 | 0.007   | 0.000   | 0.004   | 0.003   |
| MC-RR                    | 0.003  | 0.004  | 0.062  | 0.013  | 0.000   | 0.001   | 0.001 | 0.000 | 0.000   | 0.000   | 0.001   | 0.000   |
| MC-YR                    | 0.147  | 0.260  | 1.444  | 0.330  | 0.180   | 0.083   | 0.167 | 0.437 | 0.274   | 0.016   | 0.324   | 0.140   |
| Treatment                | I      | II     | III    | IV     | I       | II      | III   | IV    | I       | II      | III     | IV      |
| Letter of significance   | 19.07  | 19.07  | 19.07  | 19.07  | 5.08    | 5.08    | 5.08  | 5.08  | 19.08   | 19.08   | 19.08   | 19.08   |
| [D-Asp3]MC-LR            | a      | a      | a      | a      | b       | a       | b     | b     | b       | a       | c       | c       |
| MC-LR                    | a      | a      | a      | a      | a       | a       | b     | b     | a       | a       | b       | c       |
| [D-Glu-OCH36]MC-LR       | a      | a      | b      | c      | -       | -       | a     | a     | -       | -       | -       | -       |
| [D-Asp3]MC-RR            | a      | ab     | b      | b      | -       | -       | a     | a     | -       | -       | -       | -       |
| MC-LW                    | a      | a      | b      | b      | -       | a       | b     | b     | -       | -       | -       | -       |
| [Dha7]MC-YR              | a      | a      | a      | a      | c       | a       | c     | b     | a       | b       | a       | a       |
| MC-RR                    | a      | b      | c      | c      | a       | a       | b     | b     | a       | d       | b       | c       |
| MC-YR                    | a      | a      | a      | a      | b       | a       | c     | b     | b       | a       | c       | c       |
